# Supplementary material for: Competitive and cooperative n → π* and n → σ* interactions in benzaldehyde–formaldehyde: rotational characterization
Source: Royal Society of Chemistry journal article supplement (doi:10.1039/d0cp06409b), 2021-01-01

**Electronic Supplementary Material (ESI) for Physical Chemistry Chemical Physics.**

**This journal is © the Owner Societies 2019**

**Competitive and Cooperative between  $n \rightarrow \pi^*$  and  $n \rightarrow \sigma^*$  Interactions in  
Benzaldehyde-Formaldehyde: Rotational Characterization**

Hao Wang,<sup>a</sup> Juan Wang,<sup>a</sup> Junhua Chen<sup>a</sup>, Sven Herbers,<sup>a</sup> Huaili Zheng<sup>b</sup> and Qian Gou <sup>\*a</sup>

<sup>a</sup> School of Chemistry and Chemical Engineering, Chongqing University, Daxuecheng South Rd. 55, 401331, Chongqing, China.

<sup>b</sup> Key Laboratory of the Three Gorges Reservoir Region's Eco-Environment, State Ministry of Education, Chongqing University, No.83 Shabei Str., Shapingba, Chongqing, 400045, China

Corresponding Authors

\* Qian Gou: [qian.gou@cqu.edu.cn](mailto:qian.gou@cqu.edu.cn);

## **Contents:**

1. **Table S1.** The binding composition of noncovalent interactions of complexes of formaldehyde (FA).
2. **Table S2.** The calculated spectroscopic parameters and relative energies of the four isomers of the BA-FA complex at different levels of theory.
3. **Table S3-8.** Experimental transition frequencies of the observed isomers of benzaldehyde-formaldehyde (BA-FA).
4. **Tables S9-12.** Partial  $r_0$  and MP2/6-311++G(d,p) calculated geometries of isomers I and II of BA-FA.
5. **Table S13.** Measured intensities (in arbitrary units) of the two isomers for several  $\mu_a$ -type selected transitions.
6. **Tables S14-18.** Stabilization energy contributions ( $> 0.2 \text{ kJ mol}^{-1}$ ) in four theoretical predicted isomers of BA-FA and the FA homodimer.

**Table S1.** The binding composition of noncovalent interactions of complexes of formaldehyde (FA).

|                                   | <b>Prior</b>                  | <b>Secondary</b>            | <b>Refs.</b> |
|-----------------------------------|-------------------------------|-----------------------------|--------------|
| FA-HF                             | $n \rightarrow \sigma^*$ HB   | -                           | [1]          |
| FA-HCl                            | $n \rightarrow \sigma^*$ HB   | -                           | [2]          |
| FA-CIF                            | $n \rightarrow \sigma^*$ HaB  | -                           | [2]          |
| FA-H <sub>2</sub> O               | $n \rightarrow \sigma^*$ HB   | -                           | [3]          |
| FA-CO <sub>2</sub>                | $n \rightarrow \pi^*$ TB      | $n \rightarrow \sigma^*$ HB | [4]          |
| FA-CF <sub>2</sub> H <sub>2</sub> | $n \rightarrow \sigma^*$ HB   | $n \rightarrow \sigma^*$ HB | [5]          |
| FA-CFCIH <sub>2</sub>             | $n \rightarrow \sigma^*$ HB   | $n \rightarrow \sigma^*$ HB | [6]          |
| FA-CF <sub>3</sub> Cl             | $n \rightarrow \sigma^*$ HaB  | -                           | [7]          |
| FA-acetylene                      | $\pi \rightarrow \sigma^*$ HB | $n \rightarrow \sigma^*$ HB | [8]          |
| FA-dimer                          | $n \rightarrow \pi^*$ TB      | $n \rightarrow \sigma^*$ HB | [9]          |
| FA-formic acid                    | $n \rightarrow \sigma^*$ HB   | -                           | [10]         |
| FA-pyridine                       | $n \rightarrow \pi^*$ TB      | $n \rightarrow \sigma^*$ HB | [11]         |
| FA-BA                             | $n \rightarrow \pi^*$ TB      | $n \rightarrow \sigma^*$ HB | This work    |

- [1] F. J. Lovas and R. D. Suenram, *J. Mol. Spectrosc.*, 1987, **123**, 167–186.
- [2] S. A. Cooke, G. K. Corlett, C. M. Evans, and A. C. Legon, *J. Chem. Phys.*, 1998, **108**, 39-45.
- [3] F. J. Lovas and C. L. Lugez, *J. Mol. Spectrosc.*, 1996, **179**, 320–323.
- [4] T. A. Blake, S. E. Novick, F. J. Lovas and R. D. Suenram, *J. Mol. Spectrosc.*, 1992, **154**, 72–82.
- [5] Q. Gou, G. Feng, L. Evangelisti, M. Vallejo López, A. Lesarri, E. J. Cocinero, W. Caminati, *Phys. Chem. Chem. Phys.* 2013, **15**, 6714 – 6718.
- [6] G. Feng, Q. Gou, L. Evangelisti, M. Vallejo López, A. Lesarri, E. J. Cocinero, W. Caminati, *Phys. Chem. Chem. Phys.* 2014, **16**, 12261 – 12265.
- [7] Q. Gou, G. Feng, L. Evangelisti, M. V. López, L. Spada, A. Lesarri, E. J. Cocinero and W. Caminati, *Chem. Eur. J.*, 2015, **21**, 4148–4152.
- [8] N. W. Howard and A. C. Legon, *J. Chem. Phys.*, 1988, **88**, 6793-6800.
- [9] F. J. Lovas, R. D. Suenram and L. H. Coudert, *J. Chem. Phys.*, 1990, **92**, 891-898.
- [10] V. V. Ilyushina, F. J. Lovas and D. F. Plusquellic, *J. Mol. Spectrosc.*, 2006, **239**, 94-100.
- [11] S. Blanco and J. Carlos López, *J. Phys. Chem. Lett.*, 2018, **9**, 4632–4637.

**Table S2.** The calculated spectroscopic parameters and relative energies of the four isomers of the BA-FA complex at different levels of theory.

|              |               | <i>A/B/C</i> MHz | Largest discrepancy (%) | $\Delta E_0/\text{cm}^{-1}$ | $\Delta E_{0,\text{BSE}}/\text{cm}^{-1}$ |     |
|--------------|---------------|------------------|-------------------------|-----------------------------|------------------------------------------|-----|
| MP2          | 6-311++G(d,p) | I                | <b>3843/550/483</b>     | 0.7%                        | 0                                        | 0   |
|              |               | II               | <b>2304/734/560</b>     | 0.8%                        | 31                                       | 28  |
|              |               | III              | 2045/736/541            | -                           | 51                                       | 48  |
|              |               | IV               | 3527/516/451            | -                           | 195                                      | 191 |
|              | aug-cc-pVTZ   | I                | 3858/567/496            | 3.7%                        | 0                                        | 0   |
|              |               | II               | 2341/752/571            | 3.2%                        | 35                                       | 33  |
|              |               | III              | 2043/730/535            | -                           | 65                                       | 60  |
|              |               | IV               | 3516/530/460            | -                           | 187                                      | 183 |
| B3LYP-D3(BJ) | 6-311++G(d,p) | I                | 3906/561/493            | 2.8%                        | 0                                        | 0   |
|              |               | II               | 2351/747/569            | 2.5%                        | 84                                       | 81  |
|              |               | III              | 2095/751/553            | -                           | 135                                      | 114 |
|              |               | IV               | 3581/526/458            | -                           | 306                                      | 278 |
|              | aug-cc-pVTZ   | I                | 3907/564/495            | 3.3%                        | 0                                        | 0   |
|              |               | II               | 2344/750/570            | 2.9%                        | 101                                      | 99  |
|              |               | III              | 2079/755/554            | -                           | 160                                      | 148 |
|              |               | IV               | 3582/526/458            | -                           | 306                                      | 299 |
| M06-2X       | 6-311++G(d,p) | I                | 3942/564/495            | 3.2%                        | 0                                        | 0   |
|              |               | II               | 2400/747/572            | 4.5%                        | 154                                      | 159 |
|              |               | III              | 2099/752/554            | -                           | 337                                      | 309 |
|              |               | IV               | 3562/524/463            | -                           | 337                                      | 309 |
|              | aug-cc-pVTZ   | I                | 3929/568/498            | 3.9%                        | 0                                        | 0   |
|              |               | II               | 2391/752/574            | 4.1%                        | 185                                      | 181 |
|              |               | III              | 2090/758/549            | -                           | 316                                      | 300 |
|              |               | IV               | 3563/533/458            | -                           | 320                                      | 301 |

**Table S3.** Experimental transition frequencies  $\nu_{\text{obs}}$  of the parent species of isomer I with quantum numbers and difference to calculated frequencies  $\Delta\nu$  in the least squares fit

| $J'$ | $K_a'$ | $K_c'$ | $J''$ | $K_a''$ | $K_c''$ | $\nu_{\text{obs}}/\text{MHz}$ | $\Delta\nu_{\text{obs-calc}}/\text{kHz}$ |
|------|--------|--------|-------|---------|---------|-------------------------------|------------------------------------------|
| 5    | 0      | 5      | 4     | 0       | 4       | 5111.7436                     | -0.5                                     |
| 5    | 1      | 4      | 4     | 1       | 3       | 5292.9344                     | -0.3                                     |
| 5    | 1      | 5      | 4     | 1       | 4       | 4961.4883                     | -2.5                                     |
| 5    | 2      | 3      | 4     | 2       | 2       | 5149.1745                     | -1.1                                     |
| 5    | 2      | 4      | 4     | 2       | 3       | 5129.3575                     | -0.9                                     |
| 5    | 3      | 2      | 4     | 3       | 1       | 5135.0864                     | -4.9                                     |
| 5    | 3      | 3      | 4     | 3       | 2       | 5314.8969                     | 1.1                                      |
| 6    | 0      | 6      | 5     | 0       | 5       | 6123.3030                     | 1.4                                      |
| 6    | 1      | 5      | 5     | 1       | 4       | 6348.6205                     | 0.1                                      |
| 6    | 1      | 6      | 5     | 1       | 5       | 5951.1770                     | -2.8                                     |
| 6    | 2      | 4      | 5     | 2       | 3       | 6187.9393                     | -0.6                                     |
| 6    | 2      | 5      | 5     | 2       | 4       | 6153.3900                     | 1.0                                      |
| 6    | 3      | 3      | 5     | 3       | 2       | 6163.5988                     | -3.5                                     |
| 6    | 3      | 4      | 5     | 3       | 3       | 6163.0805                     | -0.7                                     |
| 6    | 4      | 2      | 5     | 4       | 1       | 6161.2635                     | -1.5                                     |
| 6    | 4      | 3      | 5     | 4       | 2       | 6161.2635                     | 1.1                                      |
| 7    | 0      | 7      | 6     | 0       | 6       | 7129.1808                     | -0.7                                     |
| 7    | 1      | 6      | 6     | 1       | 5       | 7402.6386                     | 0.5                                      |
| 7    | 1      | 7      | 6     | 1       | 6       | 6939.5270                     | -0.8                                     |
| 7    | 2      | 5      | 6     | 2       | 4       | 7231.3637                     | -0.6                                     |
| 7    | 2      | 6      | 6     | 2       | 5       | 7176.4160                     | -0.6                                     |
| 7    | 3      | 4      | 6     | 3       | 3       | 7193.0134                     | -0.3                                     |
| 7    | 3      | 5      | 6     | 3       | 4       | 7191.8442                     | 1.7                                      |
| 7    | 4      | 3      | 6     | 4       | 2       | 7189.1245                     | 0.5                                      |
| 7    | 4      | 4      | 6     | 4       | 3       | 7189.1147                     | -1.1                                     |
| 7    | 5      | 2      | 6     | 5       | 1       | 7187.7205                     | 3.3                                      |
| 7    | 5      | 3      | 6     | 5       | 2       | 7187.7205                     | 3.4                                      |
| 8    | 0      | 8      | 7     | 0       | 7       | 8128.7096                     | -2.2                                     |
| 8    | 1      | 7      | 7     | 1       | 6       | 8454.6365                     | 0.1                                      |
| 8    | 1      | 8      | 7     | 1       | 7       | 7926.3775                     | -0.1                                     |
| 8    | 2      | 6      | 7     | 2       | 5       | 8279.9512                     | 2.1                                      |
| 8    | 2      | 7      | 7     | 2       | 6       | 8198.2796                     | 3.3                                      |
| 8    | 3      | 5      | 7     | 3       | 4       | 8223.5476                     | -1.4                                     |
| 8    | 3      | 6      | 7     | 3       | 5       | 8221.2086                     | -0.7                                     |
| 9    | 0      | 9      | 8     | 0       | 8       | 9121.4318                     | -2.0                                     |
| 9    | 1      | 8      | 8     | 1       | 7       | 9504.2316                     | 0.3                                      |
| 9    | 1      | 9      | 8     | 1       | 8       | 8911.5970                     | 3.5                                      |
| 9    | 2      | 7      | 8     | 2       | 6       | 9333.9788                     | 0.2                                      |
| 9    | 2      | 8      | 8     | 2       | 7       | 9218.8068                     | 2.4                                      |
| 9    | 3      | 6      | 8     | 3       | 5       | 9255.4654                     | 2.1                                      |
| 9    | 3      | 7      | 8     | 3       | 6       | 9251.1825                     | -0.2                                     |

|    |   |    |    |   |    |            |      |
|----|---|----|----|---|----|------------|------|
| 10 | 0 | 10 | 9  | 0 | 9  | 10107.1640 | 0.5  |
| 10 | 1 | 9  | 9  | 1 | 8  | 10551.0005 | -0.4 |
| 10 | 1 | 10 | 9  | 1 | 9  | 9895.0940  | -4.0 |
| 10 | 2 | 8  | 9  | 2 | 7  | 10393.4562 | -2.7 |
| 10 | 2 | 9  | 9  | 2 | 8  | 10237.8421 | 2.1  |
| 10 | 3 | 7  | 9  | 3 | 6  | 10289.0500 | -0.7 |
| 10 | 3 | 8  | 9  | 3 | 7  | 10281.7357 | 1.9  |
| 11 | 0 | 11 | 10 | 0 | 10 | 11086.0301 | -3.4 |
| 11 | 1 | 10 | 10 | 1 | 9  | 11594.4799 | -2.9 |
| 11 | 1 | 11 | 10 | 1 | 10 | 10876.8044 | 0.7  |
| 11 | 2 | 9  | 10 | 2 | 8  | 11458.0731 | -1.5 |
| 11 | 2 | 10 | 10 | 2 | 9  | 11255.2286 | 2.7  |
| 11 | 3 | 8  | 10 | 3 | 7  | 11324.6459 | 0.7  |
| 11 | 3 | 9  | 10 | 3 | 8  | 11312.8002 | -1.5 |
| 12 | 0 | 12 | 11 | 0 | 11 | 12058.5004 | 0.4  |
| 12 | 1 | 11 | 11 | 1 | 10 | 12634.1705 | -2.5 |
| 12 | 1 | 12 | 11 | 1 | 11 | 11856.6799 | -2.3 |
| 12 | 2 | 10 | 11 | 2 | 9  | 12527.1818 | 1.4  |
| 12 | 2 | 11 | 11 | 2 | 10 | 12270.8131 | 3.5  |
| 12 | 3 | 9  | 11 | 3 | 8  | 12362.6186 | -3.1 |
| 12 | 3 | 10 | 11 | 3 | 9  | 12344.3018 | 7.9  |
| 13 | 0 | 13 | 12 | 0 | 12 | 13025.3040 | 0.1  |
| 13 | 1 | 13 | 12 | 1 | 12 | 12834.7306 | 0.8  |
| 2  | 2 | 0  | 1  | 1 | 1  | 12041.8189 | 0.4  |
| 2  | 2 | 1  | 1  | 1 | 0  | 11974.4942 | -0.4 |
| 3  | 1 | 3  | 2  | 0 | 2  | 6198.7000  | 9.3  |
| 3  | 2 | 1  | 2  | 1 | 2  | 13138.4492 | 8.5  |
| 3  | 2 | 2  | 2  | 1 | 1  | 12934.4739 | -8.3 |
| 3  | 3 | 0  | 2  | 2 | 1  | 19671.0536 | 4.3  |
| 3  | 3 | 1  | 2  | 2 | 0  | 19670.0426 | -3.1 |
| 4  | 2 | 2  | 3  | 1 | 3  | 14274.0238 | 4.2  |
| 5  | 1 | 5  | 4  | 0 | 4  | 7960.5253  | 6.6  |
| 5  | 2 | 4  | 4  | 1 | 3  | 14754.6113 | 0.3  |
| 6  | 1 | 6  | 5  | 0 | 5  | 8799.9594  | 5.0  |
| 6  | 2 | 5  | 5  | 1 | 4  | 15615.0656 | 5.1  |
| 7  | 1 | 7  | 6  | 0 | 6  | 9616.1843  | 3.7  |
| 7  | 2 | 6  | 6  | 1 | 5  | 16442.8548 | -6.8 |
| 8  | 1 | 8  | 7  | 0 | 7  | 10413.3863 | 9.6  |
| 8  | 2 | 7  | 7  | 1 | 6  | 17238.4888 | -8.9 |

---

**Table S4.** Experimental transition frequencies  $\nu_{\text{obs}}$  of the parent species of isomer I I with quantum numbers and difference to calculated frequencies  $\Delta\nu$  in the least squares fit.

| $J'$ | $K_a'$ | $K_c'$ | $J''$ | $K_a''$ | $K_c''$ | $\nu_{\text{obs}}/\text{MHz}$ | $\Delta\nu_{\text{obs-calc}}/\text{kHz}$ |
|------|--------|--------|-------|---------|---------|-------------------------------|------------------------------------------|
| 4    | 0      | 4      | 3     | 0       | 3       | 5007.0557                     | 3.2                                      |
| 4    | 1      | 4      | 3     | 1       | 3       | 4766.6363                     | 3.6                                      |
| 4    | 1      | 3      | 3     | 1       | 2       | 5454.3145                     | 0.1                                      |
| 4    | 2      | 3      | 3     | 2       | 2       | 5127.1059                     | 1.9                                      |
| 4    | 2      | 2      | 3     | 2       | 1       | 5257.6543                     | -0.7                                     |
| 5    | 0      | 5      | 4     | 0       | 4       | 6173.2901                     | -0.2                                     |
| 5    | 1      | 4      | 4     | 1       | 3       | 6787.8593                     | -0.9                                     |
| 5    | 1      | 5      | 4     | 1       | 4       | 5937.0934                     | 0.9                                      |
| 5    | 2      | 3      | 4     | 2       | 2       | 6640.4540                     | -1.6                                     |
| 5    | 2      | 4      | 4     | 2       | 3       | 6391.9660                     | 0.2                                      |
| 5    | 3      | 2      | 4     | 3       | 1       | 6475.7197                     | 1.1                                      |
| 5    | 3      | 3      | 4     | 3       | 2       | 6461.9490                     | 1.1                                      |
| 5    | 4      | 2      | 4     | 4       | 1       | 6452.0886                     | -1.9                                     |
| 5    | 4      | 1      | 4     | 4       | 0       | 6452.3054                     | -0.6                                     |
| 6    | 0      | 6      | 5     | 0       | 5       | 7303.3459                     | 0.3                                      |
| 6    | 1      | 5      | 5     | 1       | 4       | 8097.7862                     | -0.9                                     |
| 6    | 1      | 6      | 5     | 1       | 5       | 7096.5292                     | 0.4                                      |
| 6    | 2      | 4      | 5     | 2       | 3       | 8047.7631                     | -1.4                                     |
| 6    | 2      | 5      | 5     | 2       | 4       | 7645.7432                     | 0.1                                      |
| 6    | 3      | 3      | 5     | 3       | 2       | 7799.7100                     | -1.6                                     |
| 6    | 3      | 4      | 5     | 3       | 3       | 7763.5665                     | -0.0                                     |
| 6    | 4      | 2      | 5     | 4       | 1       | 7753.0495                     | -1.4                                     |
| 7    | 0      | 7      | 6     | 0       | 6       | 8409.4420                     | 1.3                                      |
| 7    | 1      | 6      | 6     | 1       | 5       | 9376.3583                     | -0.7                                     |
| 7    | 1      | 7      | 6     | 1       | 6       | 8245.3141                     | 0.1                                      |
| 7    | 2      | 5      | 6     | 2       | 4       | 9464.5586                     | -1.3                                     |
| 7    | 2      | 6      | 6     | 2       | 5       | 8886.5584                     | -0.6                                     |
| 7    | 3      | 4      | 6     | 3       | 3       | 9144.7817                     | 0.7                                      |
| 7    | 3      | 5      | 6     | 3       | 4       | 9065.6129                     | 1.2                                      |
| 7    | 4      | 3      | 6     | 4       | 2       | 9060.0323                     | 0.1                                      |
| 7    | 4      | 4      | 6     | 4       | 3       | 9056.8385                     | -0.2                                     |
| 7    | 5      | 3      | 6     | 5       | 2       | 9038.8749                     | 1.3                                      |
| 7    | 5      | 2      | 6     | 5       | 1       | 9038.9192                     | -8.7                                     |
| 8    | 0      | 8      | 7     | 0       | 7       | 9504.8540                     | 0.6                                      |
| 8    | 1      | 7      | 7     | 1       | 6       | 10615.7634                    | -1.2                                     |
| 8    | 1      | 8      | 7     | 1       | 7       | 9384.5696                     | 1.7                                      |
| 8    | 2      | 6      | 7     | 2       | 5       | 10874.2526                    | -0.5                                     |
| 8    | 2      | 7      | 7     | 2       | 6       | 10112.8857                    | -1.1                                     |
| 8    | 3      | 5      | 7     | 3       | 4       | 10516.9636                    | -0.3                                     |
| 8    | 3      | 6      | 7     | 3       | 5       | 10365.2755                    | 0.8                                      |

|    |   |    |    |   |    |            |      |
|----|---|----|----|---|----|------------|------|
| 8  | 4 | 5  | 7  | 4 | 4  | 10366.5076 | 1.4  |
| 8  | 4 | 4  | 7  | 4 | 3  | 10375.1836 | 1.2  |
| 8  | 5 | 4  | 7  | 5 | 3  | 10341.3132 | -2.0 |
| 8  | 5 | 3  | 7  | 5 | 2  | 10341.5320 | 0.4  |
| 9  | 0 | 9  | 8  | 0 | 8  | 10598.8055 | -0.5 |
| 9  | 1 | 8  | 8  | 1 | 7  | 11810.4107 | -1.5 |
| 9  | 1 | 9  | 8  | 1 | 8  | 10515.8611 | 0.2  |
| 9  | 2 | 7  | 8  | 2 | 6  | 12263.5465 | -0.5 |
| 9  | 2 | 8  | 8  | 2 | 7  | 11323.7024 | 0.1  |
| 9  | 3 | 6  | 8  | 3 | 5  | 11919.9920 | -0.2 |
| 9  | 3 | 7  | 8  | 3 | 6  | 11659.3301 | -0.0 |
| 9  | 4 | 6  | 8  | 4 | 5  | 11680.7382 | 1.7  |
| 9  | 4 | 5  | 8  | 4 | 4  | 11701.1898 | 0.0  |
| 9  | 5 | 5  | 8  | 5 | 4  | 11648.1660 | 1.4  |
| 9  | 5 | 4  | 8  | 5 | 3  | 11648.8628 | 0.4  |
| 10 | 0 | 10 | 9  | 0 | 9  | 11695.5693 | -2.1 |
| 10 | 1 | 9  | 9  | 1 | 8  | 12960.1263 | -1.6 |
| 10 | 1 | 10 | 9  | 1 | 9  | 11640.9029 | -1.0 |
| 10 | 2 | 8  | 9  | 2 | 7  | 13623.0924 | -0.4 |
| 10 | 2 | 9  | 9  | 2 | 8  | 12518.6182 | -0.2 |
| 10 | 3 | 7  | 9  | 3 | 6  | 13352.0222 | 0.6  |
| 10 | 3 | 8  | 9  | 3 | 7  | 12944.4886 | 1.5  |
| 10 | 4 | 7  | 9  | 4 | 6  | 12998.5358 | 0.3  |
| 10 | 4 | 6  | 9  | 4 | 5  | 13041.7314 | 4.7  |
| 10 | 5 | 6  | 9  | 5 | 5  | 12959.8521 | 0.1  |
| 10 | 5 | 5  | 9  | 5 | 4  | 12961.7880 | 2.6  |
| 11 | 0 | 11 | 10 | 0 | 10 | 12796.1464 | 0.1  |
| 11 | 1 | 10 | 10 | 1 | 9  | 14072.2069 | 0.2  |
| 11 | 1 | 11 | 10 | 1 | 10 | 12761.3038 | 1.4  |
| 11 | 2 | 9  | 10 | 2 | 8  | 14945.7455 | -0.8 |
| 11 | 2 | 10 | 10 | 2 | 9  | 13697.9646 | 0.3  |
| 11 | 3 | 8  | 10 | 3 | 7  | 14803.4703 | 1.0  |
| 11 | 3 | 9  | 10 | 3 | 8  | 14217.6988 | -0.1 |
| 11 | 4 | 8  | 10 | 4 | 7  | 14318.1884 | -0.5 |
| 11 | 4 | 7  | 10 | 4 | 6  | 14401.5044 | -2.9 |
| 12 | 0 | 12 | 11 | 0 | 11 | 13900.0638 | -1.4 |
| 12 | 1 | 11 | 11 | 1 | 10 | 15159.7865 | -0.8 |
| 12 | 1 | 12 | 11 | 1 | 11 | 13878.4087 | -0.7 |
| 12 | 2 | 11 | 11 | 2 | 10 | 14862.7700 | 0.2  |
| 13 | 0 | 13 | 12 | 0 | 12 | 15006.4757 | -0.2 |
| 13 | 1 | 13 | 12 | 1 | 12 | 14993.2777 | 1.1  |
| 2  | 2 | 0  | 1  | 1 | 1  | 7630.9731  | -0.8 |
| 2  | 2 | 1  | 1  | 1 | 0  | 7444.5236  | 0.0  |
| 3  | 2 | 2  | 2  | 1 | 1  | 8556.0160  | -0.2 |

---



|   |   |   |   |   |   |            |      |
|---|---|---|---|---|---|------------|------|
| 3 | 2 | 1 | 2 | 1 | 2 | 9141.8818  | 1.2  |
| 3 | 3 | 0 | 2 | 2 | 1 | 12132.1414 | 0.0  |
| 3 | 3 | 1 | 2 | 2 | 0 | 12117.9465 | -0.8 |
| 4 | 1 | 4 | 3 | 0 | 3 | 5960.9048  | -0.4 |
| 4 | 2 | 3 | 3 | 1 | 2 | 9579.3155  | 1.7  |
| 4 | 2 | 2 | 3 | 1 | 3 | 10813.8186 | 5.1  |
| 4 | 3 | 2 | 3 | 2 | 1 | 13373.9485 | -1.0 |
| 4 | 3 | 1 | 3 | 2 | 2 | 13445.6879 | -0.6 |
| 4 | 4 | 1 | 3 | 3 | 0 | 16717.1412 | -3.7 |
| 4 | 4 | 0 | 3 | 3 | 1 | 16717.8370 | 0.9  |
| 5 | 0 | 5 | 4 | 1 | 4 | 5219.4366  | -1.0 |
| 5 | 1 | 5 | 4 | 0 | 4 | 6890.9481  | 2.9  |
| 5 | 2 | 4 | 4 | 1 | 3 | 10516.9617 | -3.3 |
| 5 | 2 | 3 | 4 | 1 | 4 | 12687.6398 | 3.4  |
| 5 | 3 | 3 | 4 | 2 | 2 | 14578.2403 | -2.0 |
| 5 | 3 | 2 | 4 | 2 | 3 | 14794.3031 | -0.0 |
| 5 | 4 | 2 | 4 | 3 | 1 | 18002.4378 | 0.0  |
| 5 | 4 | 1 | 4 | 3 | 2 | 18007.3155 | 2.7  |
| 5 | 3 | 3 | 5 | 2 | 4 | 8383.9350  | 0.7  |
| 5 | 3 | 2 | 5 | 2 | 3 | 7956.1898  | -0.1 |
| 5 | 4 | 2 | 5 | 3 | 3 | 11545.1225 | 0.2  |
| 5 | 4 | 1 | 5 | 3 | 2 | 11526.9621 | 0.2  |
| 6 | 0 | 6 | 5 | 1 | 5 | 6585.6907  | -0.0 |
| 6 | 1 | 6 | 5 | 0 | 5 | 7814.1818  | -1.8 |
| 6 | 2 | 5 | 5 | 1 | 4 | 11374.8479 | -0.0 |
| 6 | 3 | 4 | 5 | 2 | 3 | 15701.3541 | 0.7  |
| 6 | 3 | 3 | 5 | 2 | 4 | 16202.0450 | -0.4 |
| 6 | 3 | 4 | 6 | 2 | 5 | 8501.7549  | -2.7 |
| 6 | 3 | 3 | 6 | 2 | 4 | 7708.1394  | 2.4  |
| 6 | 4 | 3 | 6 | 3 | 4 | 11533.6400 | -1.1 |
| 6 | 4 | 2 | 6 | 3 | 3 | 11480.3040 | 2.9  |
| 7 | 0 | 7 | 6 | 1 | 6 | 9616.1843  | -6.8 |
| 7 | 1 | 7 | 6 | 0 | 6 | 8756.1533  | 1.3  |
| 7 | 2 | 6 | 6 | 1 | 5 | 12163.6187 | -1.1 |
| 7 | 3 | 5 | 7 | 2 | 6 | 8680.8100  | -0.2 |
| 8 | 0 | 8 | 7 | 1 | 7 | 9158.1441  | 2.0  |
| 8 | 1 | 8 | 7 | 0 | 7 | 9731.2791  | -0.0 |
| 8 | 2 | 7 | 7 | 1 | 6 | 12900.1494 | 1.6  |
| 9 | 0 | 9 | 8 | 1 | 8 | 10372.3802 | -0.0 |
| 9 | 1 | 9 | 8 | 0 | 8 | 10742.2870 | 0.3  |

---

**Table S5.** Experimental transition frequencies  $\nu_{\text{obs}}$  of the  $^{18}\text{O}(\text{BA})$  isotopologue of isomer I with quantum numbers and difference to calculated frequencies  $\Delta\nu$  in the least squares fit

| $J'$ | $K_a'$ | $K_c'$ | $J''$ | $K_a''$ | $K_c''$ | $\nu_{\text{obs}}/\text{MHz}$ | $\Delta\nu_{\text{obs-calc}}/\text{kHz}$ |
|------|--------|--------|-------|---------|---------|-------------------------------|------------------------------------------|
| 5    | 1      | 5      | 4     | 1       | 4       | 4931.4275                     | -2.7                                     |
| 5    | 0      | 5      | 4     | 0       | 4       | 5082.6263                     | -1.6                                     |
| 5    | 2      | 3      | 4     | 2       | 2       | 5121.6423                     | 1.5                                      |
| 5    | 1      | 4      | 4     | 1       | 3       | 5266.0668                     | -2.9                                     |
| 6    | 1      | 6      | 5     | 1       | 5       | 5914.9989                     | -3.1                                     |
| 6    | 0      | 6      | 5     | 0       | 5       | 6087.9123                     | -1.7                                     |
| 6    | 1      | 5      | 5     | 1       | 4       | 6316.2512                     | -3.3                                     |
| 6    | 2      | 5      | 5     | 2       | 4       | 6119.2636                     | 2.9                                      |
| 6    | 2      | 4      | 5     | 2       | 3       | 6155.2697                     | 1.2                                      |
| 7    | 1      | 7      | 6     | 1       | 6       | 6897.1806                     | -1.1                                     |
| 7    | 0      | 7      | 6     | 0       | 6       | 7087.3001                     | -1.0                                     |
| 7    | 2      | 6      | 6     | 2       | 5       | 7136.4966                     | 3.1                                      |
| 7    | 1      | 6      | 6     | 1       | 5       | 7364.6908                     | -3.2                                     |
| 8    | 0      | 8      | 7     | 0       | 7       | 8080.1107                     | 1.7                                      |
| 8    | 2      | 7      | 7     | 2       | 6       | 8152.5150                     | 5.8                                      |

**Table S6.** Experimental transition frequencies  $\nu_{\text{obs}}$  of the  $^{18}\text{O}(\text{FA})$  isotopologue of isomer I with quantum numbers and difference to calculated frequencies  $\Delta\nu$  in the least squares fit

| $J'$ | $K_a'$ | $K_c'$ | $J''$ | $K_a''$ | $K_c''$ | $\nu_{\text{obs}}/\text{MHz}$ | $\Delta\nu_{\text{obs-calc}}/\text{kHz}$ |
|------|--------|--------|-------|---------|---------|-------------------------------|------------------------------------------|
| 5    | 0      | 5      | 4     | 0       | 4       | 4958.8342                     | 3.2                                      |
| 6    | 1      | 6      | 5     | 1       | 5       | 5775.5403                     | 1.5                                      |
| 6    | 0      | 6      | 5     | 0       | 5       | 5940.6589                     | 3.7                                      |
| 6    | 1      | 5      | 5     | 1       | 4       | 6154.7685                     | 0.4                                      |
| 7    | 1      | 7      | 6     | 1       | 6       | 6734.8841                     | 0.6                                      |
| 7    | 0      | 7      | 6     | 0       | 6       | 6917.2372                     | 1.9                                      |
| 7    | 1      | 6      | 6     | 1       | 5       | 7176.8127                     | -4.3                                     |
| 8    | 1      | 8      | 7     | 1       | 7       | 7692.8364                     | -4.4                                     |
| 8    | 0      | 8      | 7     | 0       | 7       | 7887.9367                     | 3.6                                      |
| 9    | 1      | 9      | 8     | 1       | 8       | 8649.2902                     | 1.4                                      |
| 9    | 0      | 9      | 8     | 0       | 8       | 8852.2968                     | 0.7                                      |
| 10   | 1      | 10     | 9     | 1       | 9       | 9604.1324                     | 0.3                                      |
| 10   | 0      | 10     | 9     | 0       | 9       | 9810.1088                     | -4.0                                     |
| 11   | 1      | 11     | 10    | 1       | 10      | 10557.3023                    | -1.8                                     |
| 11   | 0      | 11     | 10    | 0       | 10      | 10761.4569                    | 2.3                                      |
| 12   | 0      | 12     | 11    | 0       | 11      | 11706.6846                    | -1.6                                     |

**Table S7.** Experimental transition frequencies  $\nu_{\text{obs}}$  of the  $^{18}\text{O}(\text{BA})$  isotopologue of isomer I I with quantum numbers and difference to calculated frequencies  $\Delta\nu$  in the least squares fit

| $J'$ | $K_a'$ | $K_c'$ | $J''$ | $K_a''$ | $K_c''$ | $\nu_{\text{obs}}/\text{MHz}$ | $\Delta\nu_{\text{obs-calc}}/\text{kHz}$ |
|------|--------|--------|-------|---------|---------|-------------------------------|------------------------------------------|
| 4    | 1      | 3      | 3     | 1       | 2       | 5413.3477                     | 0.4                                      |
| 4    | 0      | 4      | 3     | 0       | 3       | 4959.3141                     | 1.1                                      |
| 4    | 1      | 4      | 3     | 1       | 3       | 4720.8581                     | -2.4                                     |
| 5    | 1      | 5      | 4     | 1       | 4       | 5879.0675                     | 3.9                                      |
| 5    | 0      | 5      | 4     | 0       | 4       | 6110.7830                     | -3.1                                     |
| 5    | 1      | 4      | 4     | 1       | 3       | 6735.0932                     | -0.1                                     |
| 6    | 1      | 6      | 5     | 1       | 5       | 7025.9405                     | 0.2                                      |
| 6    | 0      | 6      | 5     | 0       | 5       | 7226.0730                     | -1.1                                     |
| 6    | 1      | 5      | 5     | 1       | 4       | 8031.8957                     | 0.1                                      |
| 7    | 1      | 7      | 6     | 1       | 6       | 8161.9732                     | -0.1                                     |
| 7    | 0      | 7      | 6     | 0       | 6       | 8318.3748                     | 1.9                                      |
| 8    | 1      | 8      | 7     | 1       | 7       | 9288.4090                     | -1.6                                     |
| 8    | 0      | 8      | 7     | 0       | 7       | 9401.2351                     | 0.7                                      |

**Table S8.** Experimental transition frequencies  $\nu_{\text{obs}}$  of the  $^{18}\text{O}(\text{FA})$  isotopologue of isomer I I with quantum numbers and difference to calculated frequencies  $\Delta\nu$  in the least squares fit

| $J'$ | $K_a'$ | $K_c'$ | $J''$ | $K_a''$ | $K_c''$ | $\nu_{\text{obs}}/\text{MHz}$ | $\Delta\nu_{\text{obs-calc}}/\text{kHz}$ |
|------|--------|--------|-------|---------|---------|-------------------------------|------------------------------------------|
| 4    | 0      | 4      | 3     | 0       | 3       | 4875.2076                     | -6.7                                     |
| 5    | 1      | 5      | 4     | 1       | 4       | 5781.6289                     | 4.2                                      |
| 5    | 0      | 5      | 4     | 0       | 4       | 6012.9653                     | 1.2                                      |
| 5    | 1      | 4      | 4     | 1       | 3       | 6601.9464                     | -1.6                                     |
| 6    | 1      | 6      | 5     | 1       | 5       | 6911.4443                     | 2.0                                      |
| 6    | 0      | 6      | 5     | 0       | 5       | 7115.7400                     | -0.3                                     |
| 7    | 1      | 7      | 6     | 1       | 6       | 8031.0734                     | 0.9                                      |
| 7    | 0      | 7      | 6     | 0       | 6       | 8194.7683                     | -1.3                                     |
| 7    | 1      | 6      | 6     | 1       | 5       | 9124.2138                     | 0.4                                      |
| 8    | 1      | 8      | 7     | 1       | 7       | 9141.5234                     | 0.2                                      |
| 8    | 0      | 8      | 7     | 0       | 7       | 9262.6971                     | 0.8                                      |

**Table S9.** Experimental ( $r_0$ ) and ab initio ( $r_e$ ) coordinates of the O atoms of isomer I . <sup>a</sup>

| <b>Atom</b> |       | <b>a/ Å</b> | <b>b/ Å</b> | <b>c/ Å</b> |
|-------------|-------|-------------|-------------|-------------|
| <b>O8</b>   | $r_0$ | -1.5021(8)  | -1.166(2)   | 0.000       |
|             | $r_e$ | -1.514      | -1.150      | 0.063       |
| <b>O10</b>  | $r_0$ | -3.87(1)    | 0.9753(7)   | 0.000       |
|             | $r_e$ | -3.858      | 0.973       | 0.054       |

<sup>a</sup> Constrain's errors expressed in parentheses in units of the last digit.

**Table S10.** Experimental ( $r_0$ ) and ab initio ( $r_e$ ) coordinates of the O atoms for isomer II . <sup>a</sup>

| <b>Atom</b> |       | <b>a/ Å</b> | <b>b/ Å</b> | <b>c/ Å</b> |
|-------------|-------|-------------|-------------|-------------|
| <b>O8</b>   | $r_0$ | 1.5119(8)   | 1.647(2)    | 0.000       |
|             | $r_e$ | 1.526       | 1.637       | 0.007       |
| <b>O10</b>  | $r_0$ | 3.18(2)     | -1.430(3)   | 0.000       |
|             | $r_e$ | 3.152       | -1.421      | 0.147       |

<sup>a</sup> Constrain's errors expressed in parentheses in units of the last digit.

**Table S11.** Partial  $r_0$  and MP2/6-311++G(d,p) calculated geometries of isomer I .

| Bond lengths (Å) |                            | Valence angles (°) |                  | Dihedral angles (°) |        |
|------------------|----------------------------|--------------------|------------------|---------------------|--------|
| C1C2             | 1.395                      |                    |                  |                     |        |
| C2C3             | 1.403                      | C1C2C3             | 120.1            |                     |        |
| C3C4             | 1.400                      | C2C3C4             | 120.2            | C1C2C3C4            | 0.0    |
| C4C5             | 1.399                      | C3C4C5             | 119.7            | C2C3C4C5            | 0.0    |
| C5C6             | 1.404                      | C4C5C6             | 119.6            | C3C4C5C6            | 0.0    |
| C4C7             | 1.482                      | C3C4C7             | 120.8            | C2C3C4C7            | -180.0 |
| C7O8             | 1.221                      | C4C7O8             | 124.3(1)         | C3C4C7O8            | -0.0   |
| C8C9             | <b>2.75(1)<sup>a</sup></b> | C7O8C9             | <b>100.49(7)</b> | C4C7O8C9            | -180.0 |
| C9O10            | 1.216                      | O8C9O10            | <b>100.0(9)</b>  | C7O8C9O10           | 0.0    |
| C2H11            | 1.108                      | C3C2H11            | 120.3            | C4C3C2H11           | 0.0    |
| C3H12            | 1.088                      | C2C3H12            | 119.5            | C1C2C3H12           | 0.0    |
| C5H13            | 1.086                      | C4C5H13            | 120.1            | C3C4C5H13           | -180.0 |
| C6H14            | 1.086                      | C5C6H14            | 119.9            | C4C5C6H14           | 180.0  |
| C1H15            | 1.086                      | C2C1H15            | 120.0            | C3C2C1H15           | -180.0 |
| C7H16            | 1.086                      | C4C7H16            | 119.0            | C3C4C7H16           | 0.0    |
| C9H17            | 1.103                      | O8C9H17            | 90.0             | C7O8C9H17           | 120.0  |
| C9H18            | 1.103                      | O8C9H18            | 90.0             | C7O8C9H18           | -120.0 |

<sup>a</sup> Error in parentheses in units of the last digit. The parameters in bold have been adjusted to reproduce the experimental values of rotational constants. Their theoretical values are 2.722 Å, 101.0° and 99.8°, respectively.

**Table S12.** Partial  $r_0$  and MP2/6-311++G(d,p) calculated geometries of isomer I I.

| Bond lengths (Å) |                            | Valence angles (°) |                  | Dihedral angles (°) |        |
|------------------|----------------------------|--------------------|------------------|---------------------|--------|
| C1C2             | 1.403                      |                    |                  |                     |        |
| C2C3             | 1.395                      | C1C2C3             | 120.3            |                     |        |
| C3C4             | 1.405                      | C2C3C4             | 119.4            | C1C2C3C4            | 0.0    |
| C4C5             | 1.403                      | C3C4C5             | 120.3            | C2C3C4C5            | -0.0   |
| C5C6             | 1.399                      | C4C5C6             | 120.0            | C3C4C5C6            | 0.0    |
| C4C7             | 1.482                      | C3C4C7             | 120.9            | C2C3C4C7            | -180.0 |
| C7O8             | 1.220                      | C4C7O8             | 124.9            | C3C4C7O8            | -0.0   |
| C8C9             | <b>2.86(2)<sup>a</sup></b> | C7O8C9             | <b>144.65(9)</b> | C4C7O8C9            | 0.0    |
| C9O10            | 1.215                      | O8C9O10            | <b>113.1(9)</b>  | C7O8C9O10           | -0.0   |
| C2H11            | 1.086                      | C3C2H11            | 119.7            | C4C3C2H11           | -180.0 |
| C3H12            | 1.086                      | C2C3H12            | 120.9            | C1C2C3H12           | -180.0 |
| C5H13            | 1.088                      | C4C5H13            | 119.6            | C3C4C5H13           | -180.0 |
| C6H14            | 1.086                      | C5C6H14            | 120.1            | C4C5C6H14           | 180.0  |
| C1H15            | 1.086                      | C2C1H15            | 119.9            | C3C2C1H15           | 180.0  |
| C7H16            | 1.110                      | C4C7H16            | 114.8            | C3C4C7H16           | 180.0  |
| C9H17            | 1.103                      | O8C9H17            | 90.0             | C7O8C9H17           | -120.0 |
| C9H18            | 1.103                      | O8C9H18            | 90.0             | C7O8C9H18           | 120.0  |

<sup>a</sup> Error in parentheses in units of the last digit. The parameters in bold have been adjusted to reproduce the experimental values of rotational constants. Their theoretical values are 2.85 Å, 144.3° and 110.2°, respectively

**Table S13.** Measured intensities (in arbitrary units) of the two observed isomers for several  $\mu_a$ -type selected transitions.

| Transitions                  | Isomer | Frequencies | Intensities |
|------------------------------|--------|-------------|-------------|
| $6_{06} \leftarrow 5_{05}$   | I      | 6123.3025   | 0.0543      |
|                              | II     | 7303.3412   | 0.0264      |
| $6_{16} \leftarrow 5_{15}$   | I      | 5951.1718   | 0.0204      |
|                              | II     | 7096.5221   | 0.0211      |
| $7_{07} \leftarrow 6_{06}$   | I      | 7129.1845   | 0.0472      |
|                              | II     | 8409.4478   | 0.0104      |
| $7_{17} \leftarrow 6_{16}$   | I      | 6939.5246   | 0.0193      |
|                              | II     | 8245.3145   | 0.0132      |
| $8_{08} \leftarrow 7_{07}$   | I      | 8128.7189   | 0.0229      |
|                              | II     | 9504.8578   | 0.0114      |
| $8_{18} \leftarrow 7_{17}$   | I      | 7926.3752   | 0.0174      |
|                              | II     | 9384.5687   | 0.0095      |
| $9_{09} \leftarrow 8_{08}$   | I      | 9121.4342   | 0.0262      |
|                              | II     | 10598.8012  | 0.0041      |
| $9_{19} \leftarrow 8_{18}$   | I      | 8911.6012   | 0.0109      |
|                              | II     | 10515.8678  | 0.0079      |
| $10_{010} \leftarrow 9_{09}$ | I      | 10107.1612  | 0.0147      |
|                              | II     | 11695.5748  | 0.0050      |
| $10_{110} \leftarrow 9_{19}$ | I      | 9895.0978   | 0.0177      |
|                              | II     | 11640.9045  | 0.0049      |

**Table S14.** Stabilization energy contributions ( $> 0.2 \text{ kJ mol}^{-1}$ ) in isomer I of BA-FA.

| Donor NBO                 | Acceptor NBO            | E (kJ mol <sup>-1</sup> ) |
|---------------------------|-------------------------|---------------------------|
| From benzaldehyde to HCHO |                         |                           |
| $\sigma(1)$ C12 - H13     | $\pi^*(1)$ C15 - O18    | 0.25                      |
| $\sigma(1)$ C12 - H13     | $\pi^*(2)$ C15 - O18    | 0.38                      |
| $\pi(1)$ C12 - O14        | $\pi^*(2)$ C15 - O18    | 0.38                      |
| n(1) O14                  | $\pi^*(2)$ C15 - O18    | 4.14                      |
| n(2) O14                  | $\sigma^*(1)$ C15 - H16 | 0.25                      |
| n(2) O14                  | $\sigma^*(1)$ C15 - H17 | 0.25                      |
| n(2) O14                  | $\pi^*(1)$ C15 - O18    | 1.21                      |
| n(2) O14                  | $\pi^*(2)$ C15 - O18    | 11.25                     |
| From HCHO to benzaldehyde |                         |                           |
| $\pi(2)$ C15 - O18        | $\sigma^*(1)$ C3 - C12  | 1.17                      |
| $\pi(2)$ C15 - O18        | $\sigma^*(1)$ C12 - H13 | 1.25                      |
| $\pi(2)$ C15 - O18        | $\pi^*(1)$ C12 - O14    | 0.54                      |
| n(2) O18                  | $\sigma^*(1)$ C12 - H13 | 1.92                      |

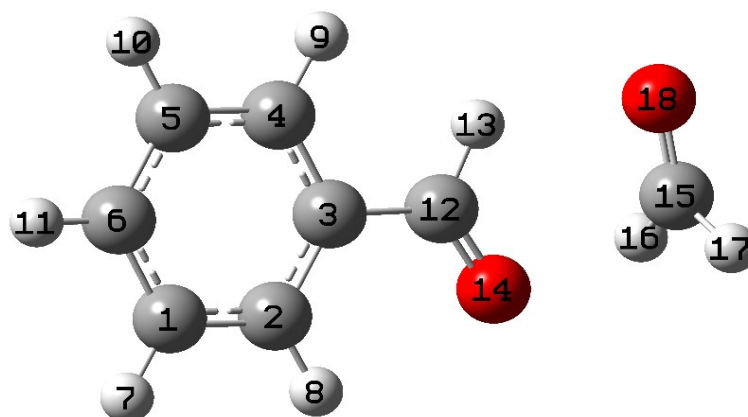



**Table S15.** Stabilization energy contributions ( $> 0.2 \text{ kJ mol}^{-1}$ ) in isomer II of BA-FA.

| Donor NBO                 | Acceptor NBO          | E (kJ mol <sup>-1</sup> ) |
|---------------------------|-----------------------|---------------------------|
| From benzaldehyde to HCHO |                       |                           |
| n(1) O14                  | $\pi^*(2)$ C15 - O18  | 5.82                      |
| n(2) O14                  | $\pi^*(2)$ C15 - O18  | 3.84                      |
| From HCHO to benzaldehyde |                       |                           |
| $\pi(2)$ C15 - O18        | $\sigma^*(1)$ C2 - H8 | 1.51                      |
| $\pi(2)$ C15 - O18        | $\pi^*(1)$ C12 - O14  | 0.25                      |
| n(1) O18                  | $\sigma^*(1)$ C2 - H8 | 1.17                      |
| n(2) O18                  | $\sigma^*(1)$ C2 - H8 | 0.50                      |

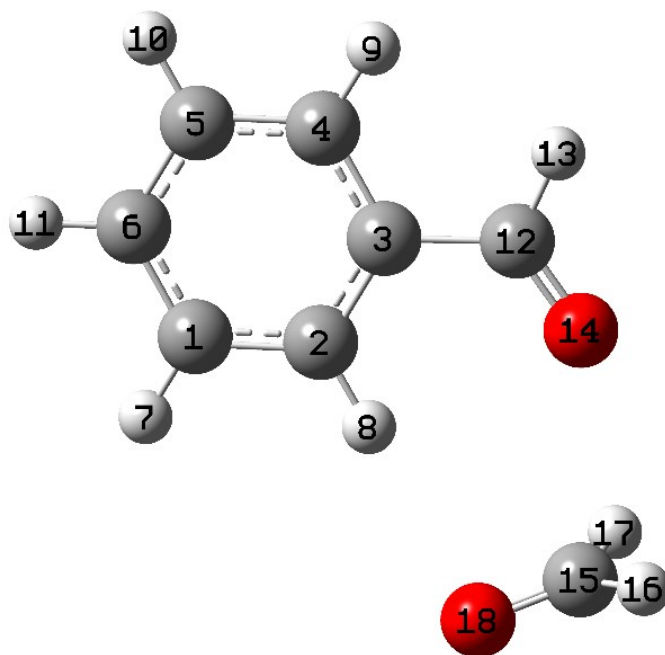

**Table S16.** Stabilization energy contributions ( $> 0.2 \text{ kJ mol}^{-1}$ ) in isomer III of BA-FA.

| Donor NBO                            | Acceptor NBO                           | E ( $\text{kJ mol}^{-1}$ ) |
|--------------------------------------|----------------------------------------|----------------------------|
| From benzaldehyde to HCHO            |                                        |                            |
| $\sigma(1) \text{ C12} - \text{H13}$ | $\sigma^*(1) \text{ C15} - \text{H16}$ | 0.21                       |
| $n(1) \text{ O14}$                   | $\sigma^*(1) \text{ C15} - \text{H16}$ | 0.66                       |
| $n(2) \text{ O14}$                   | $\sigma^*(1) \text{ C15} - \text{H16}$ | 4.96                       |
| From HCHO to benzaldehyde            |                                        |                            |
| $\sigma(1) \text{ C15} - \text{H16}$ | $\pi^*(1) \text{ C12} - \text{O14}$    | 0.25                       |
| $n(1) \text{ O18}$                   | $\sigma^*(1) \text{ C2} - \text{H8}$   | 1.55                       |
| $n(2) \text{ O18}$                   | $\sigma^*(1) \text{ C2} - \text{H8}$   | 4.73                       |

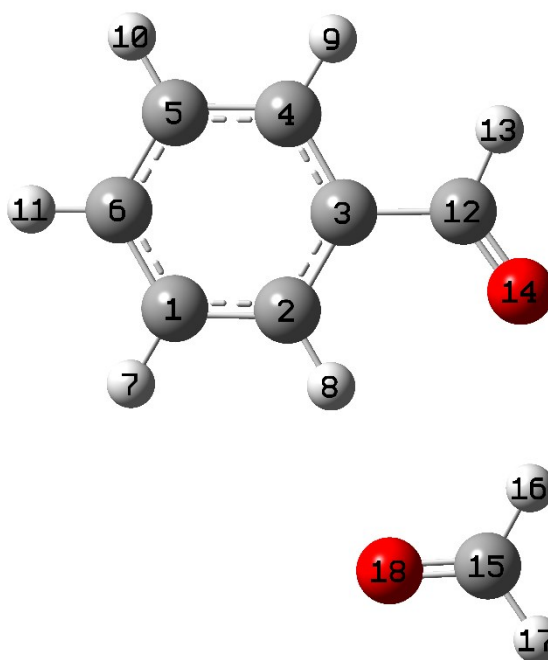

**Table S17.** Stabilization energy contributions ( $> 0.2 \text{ kJ mol}^{-1}$ ) in isomer IV of BA-FA

| Donor NBO                 | Acceptor NBO                           | E (kJ mol <sup>-1</sup> ) |
|---------------------------|----------------------------------------|---------------------------|
| From benzaldehyde to HCHO |                                        |                           |
| n(1) O14                  | $\sigma^*(1) \text{ C15} - \text{H17}$ | 0.75                      |
| n(2) O14                  | $\sigma^*(1) \text{ C15} - \text{H16}$ | 0.25                      |
| n(2) O14                  | $\sigma^*(1) \text{ C15} - \text{H17}$ | 2.22                      |
| From HCHO to benzaldehyde |                                        |                           |
| n(1) O18                  | $\sigma^*(1) \text{ C12} - \text{H13}$ | 0.96                      |
| n(2) O18                  | $\sigma^*(1) \text{ C2} - \text{C12}$  | 0.38                      |
| n(2) O18                  | $\sigma^*(1) \text{ C12} - \text{H13}$ | 1.88                      |

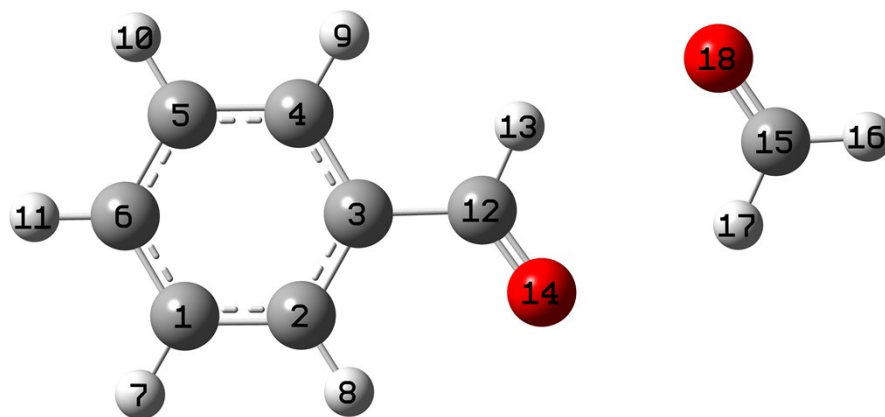

**Table S18.** Stabilization energy contributions ( $> 0.2 \text{ kJ mol}^{-1}$ ) in the FA homodimer.

| Donor NBO                          | Acceptor NBO                         | E (kJ mol <sup>-1</sup> ) |
|------------------------------------|--------------------------------------|---------------------------|
| From HCHO to HCHO                  |                                      |                           |
| $\pi(2) \text{ C1} - \text{O4}$    | $\sigma^*(1) \text{ C5} - \text{H6}$ | 0.67                      |
| $\pi(2) \text{ C1} - \text{O4}$    | $\sigma^*(1) \text{ C5} - \text{H7}$ | 1.59                      |
| $\pi(2) \text{ C1} - \text{O4}$    | $\pi^*(2) \text{ C5} - \text{O8}$    | 0.75                      |
| $n(1) \text{ O4}$                  | $\sigma^*(1) \text{ C5} - \text{H7}$ | 1.39                      |
| From HCHO to HCHO                  |                                      |                           |
| $\sigma(1) \text{ C5} - \text{H6}$ | $\pi^*(2) \text{ C1} - \text{O4}$    | 0.21                      |
| $\sigma(1) \text{ C5} - \text{H7}$ | $\pi^*(2) \text{ C1} - \text{O4}$    | 0.42                      |
| $\pi(2) \text{ C5} - \text{O8}$    | $\pi^*(2) \text{ C1} - \text{O4}$    | 0.33                      |
| $n(1) \text{ O8}$                  | $\pi^*(2) \text{ C1} - \text{O4}$    | 3.51                      |
| $n(2) \text{ O8}$                  | $\sigma^*(1) \text{ C1} - \text{H2}$ | 0.38                      |
| $n(2) \text{ O8}$                  | $\sigma^*(1) \text{ C1} - \text{H3}$ | 0.38                      |
| $n(2) \text{ O8}$                  | $\pi^*(1) \text{ C1} - \text{O4}$    | 1.09                      |
| $n(2) \text{ O8}$                  | $\pi^*(2) \text{ C1} - \text{O4}$    | 11.26                     |

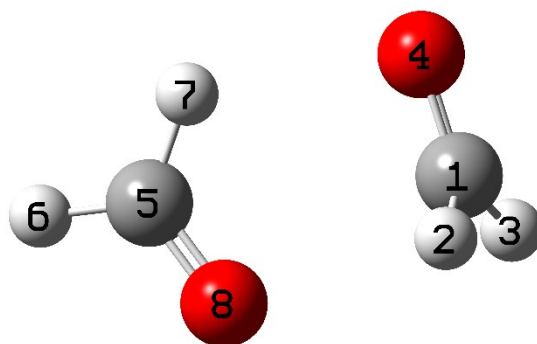

Supplement: d0cp06409b1.pdf [file d0cp06409b1.pdf]
